# Supplementary material
Source: Springer Nature journal article supplement (https://www.springermedizin.de/resource/supplementary/13019_2012_778_MOESM8_ESM.pdf/9639066)

**Figure 5b**

**Sheep 6652:**

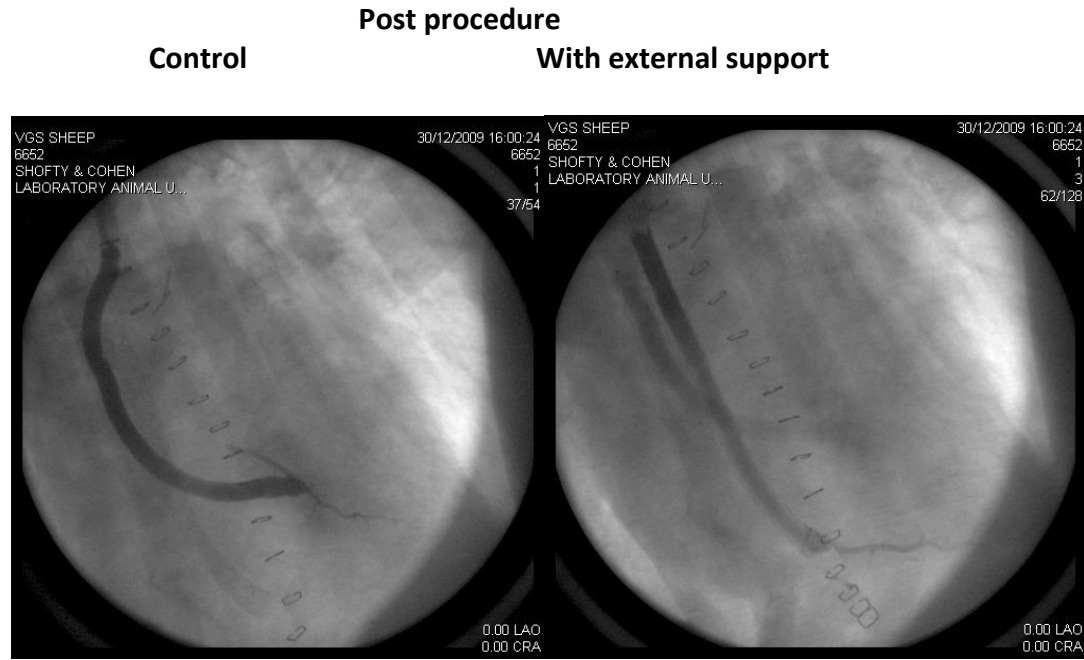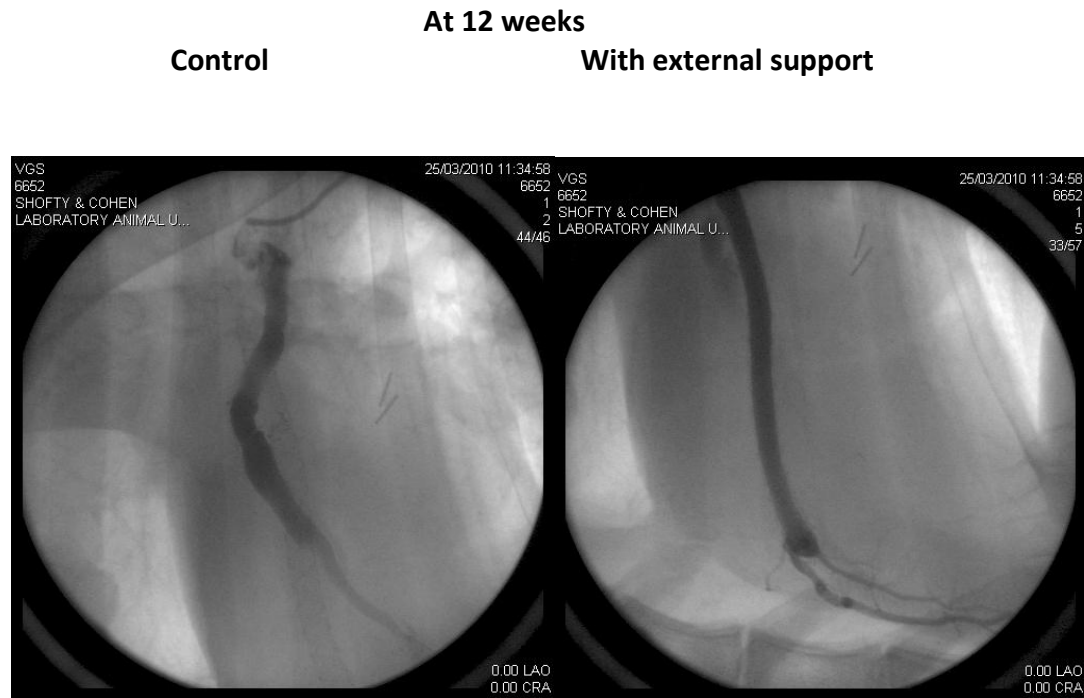

Supplement: MOESM8 [file 9639066]
